# Supplementary material
Source: PubMed Central journal article supplement (PMC4608367)

# THE LANCET

## **Supplementary appendix**

This appendix formed part of the original submission and has been peer reviewed. We post it as supplied by the authors.

Supplement to: Mega JL, Stitzel NO, Smith JG, et al. Genetic risk, coronary heart disease events, and the clinical benefit of statin therapy: an analysis of primary and secondary prevention trials. *Lancet* 2015; published online March 4. [http://dx.doi.org/10.1016/S0140-6736\(14\)61730-X](http://dx.doi.org/10.1016/S0140-6736(14)61730-X).

## **Supplemental Methods.**

### *Construction of the Genetic Risk Score*

In each locus comprising the genetic risk score, the lead SNP or a proxy in linkage disequilibrium ( $r^2 > 0.8$ ) was directly genotyped in MDCS, ASCOT, CARE, and PROVE IT-TIMI 22 (see Supplemental Table 2 for details). In JUPITER, genotypes for 11 of the loci were directly assessed using the Omni1-Quad platform as previously described.<sup>1</sup> Genotypes for the remaining loci were statistically imputed using 1000 Genomes Project data as previously described.<sup>2</sup> All imputed SNPs had an imputation  $R_{sq} \geq 0.88$ . Quality control (QC) procedures were applied to remove variants with missing genotypes in  $>5\%$  of individuals and samples missing  $>5\%$  of genotypes. A linear sum of the risk alleles weighted by the log of the odds ratio observed for each SNP in the original report comprised the genetic risk score. In JUPITER, the 1000 Genomes imputation data were used to infer any missing genotypes in individuals. In the other studies, missing genotypes in individuals were assigned the mean genotype value observed within the study.

<sup>1</sup> Chasman DI, Giulianini F, MacFadyen J, Barratt BJ, Nyberg F, Ridker PM. Genetic determinants of statin-induced low-density lipoprotein cholesterol reduction: the Justification for the Use of Statins in Prevention: an Intervention Trial Evaluating Rosuvastatin (JUPITER) trial. *Circ Cardiovasc Genet.* 2012; **5**(2): 257-64.

<sup>2</sup> Chu AY, Giulianini F, Barratt BJ, Nyberg F, Chasman DI, Ridker PM. Pharmacogenetic determinants of statin-induced reductions in C-reactive protein. *Circ Cardiovasc Genet.* 2012; **5**(1): 58-65.

### *Scaling Factor*

A scaling factor was created for each trial by which to multiply the event rate difference for statin versus placebo and upper and lower bounds of the 95% CI so that the event rate difference in the intermediate genetic risk score category for each trial was 1%. Then within each trial, meta-regression was performed across the genetic risk score categories to determine how the relative magnitude of absolute risk reduction with statin therapy varied by genetic risk score category. The coefficient represents the relative degree by which the absolute risk reduction with statin therapy varies when one shifts genetic risk score category. Meta-analysis was then performed combining the regression coefficients from the 4 trials. In terms of the clinical interpretation of the resultant number, a value of 0.50, for example, would indicate a 50% greater absolute risk reduction with statin therapy in patients with a high vs. an intermediate genetic risk score. If statin therapy in the average or intermediate population followed for a certain amount time would be expected to yield an 8% absolute risk reduction, enriching for patients with a high genetic risk score should yield a 12% absolute risk reduction.

**Supplemental Table 1. Characteristics of Participants in the Studies**

|                                   | <b>MDCS</b>         | <b>JUPITER</b> | <b>ASCOT*</b>  | <b>CARE</b>    | <b>PROVE IT-TIMI 22</b> |
|-----------------------------------|---------------------|----------------|----------------|----------------|-------------------------|
| N                                 | 27,817              | 8,749          | 6,978          | 2,878          | 1,999                   |
| Age, yrs (mean, SD)               | 57.91 (7.63)        | 66.10 (7.77)   | 62.44 (8.48)   | 58.42 (9.31)   | 57.48 (11.06)           |
| Sex, male (%)                     | 38.7                | 67.8           | 79.7           | 86.1           | 77.5                    |
| Race, white (%)                   | Swedish nationality | 100.0          | 95.1           | 93.5           | 90.0                    |
| Diabetes Mellitus (%)             | 4.1                 | 0.4            | 21.7           | 13.6           | 16.9                    |
| Smoking (%)                       | 28.7                | 13.2           | 32.7           | 16.7           | 38.1                    |
| Hypertension (%)                  | 60.6                | 55.9           | 100.0          | 42.6           | 50.7                    |
| HDL Cholesterol, mg/dL (mean, SD) | 53.4 (14.3)         | 52.14 (15.31)  | 49.93 (13.75)  | 38.70 (8.90)   | 39.87 (10.56)           |
| LDL Cholesterol, mg/dL (mean, SD) | 161.25 (38.3)       | 106.31 (17.33) | 147.64 (36.79) | 138.86 (14.62) | 109.31 (30.03)          |
| Follow up, yrs (mean, SD)         | 13.89 (3.48)        | 2.37 (1.05)    | 6.11 (1.03)    | 4.94 (0.72)    | 2.03 (0.57)             |

Continuous variables are presented as means with standard deviations and categorical variables are presented as proportions.

\*Includes participants from the lipid-lowering randomized trial and from the blood pressure lowering trial who were not taking statins.

**Supplemental Table 2. Components of the Genetic Risk Score by Study**

| Locus              | MDCS       | JUPITER    | ASCOT      | CARE       | PROVE IT-TIMI 22 |
|--------------------|------------|------------|------------|------------|------------------|
| 1p13.3 (SORT1)     | rs599839   | rs646776   | rs646776   | rs646776   | rs646776         |
| 1p32.2 (PPAP2B)    | rs17114036 | rs17114036 | rs17114036 | rs17114036 | rs17114036       |
| 1p32.3 (PCSK9)     | rs11206510 | rs11206510 | rs11206510 | rs11206510 | rs11206510       |
| 1q41 (MIA3)        | rs17465637 | rs17465637 | rs17465637 | rs2133189  | rs17465637       |
| 21q22.11 (KCNE2)   | rs9982601  | rs9305545  | rs9305545  | rs9982601  | rs9305545        |
| 2q33.1 (WDR12)     | rs6725887  | rs6725887  | rs6725887  | rs35212307 | rs6725887        |
| 3q22.3 (MRAS)      | rs9818870  | rs9818870  | rs9818870  | rs9818870  | rs9818870        |
| 6p21.31 (ANKS1A)   | rs17609940 | N/A        | N/A        | rs17609940 | rs17609940       |
| 6p24.1 (PHACTR1)   | rs9349379  | rs12526453 | rs12526453 | rs2327621  | rs12526453       |
| 6q23.2 (TCF21)     | rs12190287 | rs1967917  | rs1967917  | rs12190287 | rs12190287       |
| 6q25.3 (LPA)       | rs3798220  | rs3798220  | rs3798220  | rs3798220  | rs3798220        |
| 6q25.3 (LPA)       | rs10455872 | rs10455872 | rs10455872 | rs10455872 | rs10455872       |
| 7q32.2 (ZC3HC1)    | rs11556924 | rs11556924 | rs11556924 | rs11556924 | rs11556924       |
| 9p21.3 (CDKN2A)    | rs4977574  | rs4977574  | rs4977574  | rs10757274 | rs4977574        |
| 9q34.2 (ABO)       | rs9411489  | rs579459   | rs579459   | rs651007   | rs579459         |
| 10q11.21 (CXCL12)  | rs1746048  | rs1746048  | rs1746048  | rs915083   | rs1746048        |
| 10q24.32 (CYP17A1) | rs12413409 | rs12411886 | rs12411886 | rs12411886 | rs12411886       |
| 11q23.3 (APOA5)    | rs964184   | rs964184   | rs964184   | rs964184   | rs964184         |
| 12q24 (HNF1A)      | rs2259816  | rs2259816  | rs2259816  | rs1169313  | rs2259816        |
| 12q24.12 (SH2B3)   | rs3184504  | rs653178   | rs653178   | rs3184504  | rs3184504        |
| 13q34 (COL4A1)     | rs4773144  | rs4773144  | rs4773144  | rs3809346  | rs4773144        |
| 14q32.2 (HHIPL1)   | rs2895811  | rs2895811  | rs2895811  | rs2895811  | rs2895811        |
| 15q25.1 (ADAMTS7)  | rs3825807  | rs3825807  | rs3825807  | rs3825807  | rs3825807        |
| 17p11.2 (RASD1)    | rs12936587 | rs12936587 | rs12936587 | rs12936587 | rs12936587       |
| 17p13.3 (SMG6)     | rs216172   | rs216172   | rs216172   | rs216172   | rs216172         |
| 17q21.32 (UBE2Z)   | rs46522    | rs46522    | rs46522    | rs46522    | rs46522          |
| 19p13.2 (LDLR)     | rs1122608  | rs1122608  | rs1122608  | rs1122608  | rs1122608        |

The table includes either the lead SNP or proxy that was used.

**Supplemental Table 3. Risk of Coronary Heart Disease Across Genetic Risk Score Quintiles**

| Study                          | Quintile 1  | Quintile 2                        | Quintile 3                        | Quintile 4                        | Quintile 5                        | HR per 1-SD                       | P value             |
|--------------------------------|-------------|-----------------------------------|-----------------------------------|-----------------------------------|-----------------------------------|-----------------------------------|---------------------|
| Primary Prevention Populations |             |                                   |                                   |                                   |                                   |                                   |                     |
| MDCS                           | 1.00        | 1.20<br>(1.06-1.37)               | 1.24<br>(1.08-1.42)               | 1.43<br>(1.27-1.62)               | 1.70<br>(1.51-1.91)               | 1.21<br>(1.17-1.26)               | 2x10 <sup>-25</sup> |
| JUPITER                        | 1.00        | 1.02<br>(0.44-2.3)                | 0.98<br>(0.42-2.29)               | 1.72<br>(0.80-3.71)               | 1.32<br>(0.59-2.99)               | 1.08<br>(0.84-1.38)               | 0.55                |
| ASCOT                          | 1.00        | 1.69<br>(1.08-2.64)               | 1.45<br>(0.91-2.30)               | 1.59<br>(1.01-2.52)               | 2.10<br>(1.35-3.25)               | 1.28<br>(1.13-1.45)               | 0.0001              |
| <i>Meta-Analysis</i>           | <i>1.00</i> | <i>1.25</i><br><i>(1.05-1.50)</i> | <i>1.25</i><br><i>(1.10-1.42)</i> | <i>1.45</i><br><i>(1.29-1.62)</i> | <i>1.72</i><br><i>(1.53-1.92)</i> | <i>1.21</i><br><i>(1.17-1.26)</i> | <i>&lt;0.0001</i>   |

| Secondary Prevention Populations |             |                             |                             |                             |                             |                             |               |
|----------------------------------|-------------|-----------------------------|-----------------------------|-----------------------------|-----------------------------|-----------------------------|---------------|
| CARE                             | 1.00        | 1.50<br>(0.91-2.46)         | 1.41<br>(0.85-2.34)         | 1.66<br>(1.01-2.72)         | 1.67<br>(1.01-2.76)         | 1.14<br>(0.98-1.32)         | 0.081         |
| PROVE IT-TIMI 22                 | 1.00        | 1.74<br>(0.94-3.23)         | 2.02<br>(1.11-3.66)         | 1.86<br>(1.01-3.43)         | 2.04<br>(1.10-3.80)         | 1.14<br>(0.95-1.36)         | 0.15          |
| <i>Meta-Analysis</i>             | <i>1.00</i> | <i>1.59<br/>(1.08-2.34)</i> | <i>1.64<br/>(1.11-2.41)</i> | <i>1.74<br/>(1.18-2.55)</i> | <i>1.81<br/>(1.22-2.67)</i> | <i>1.14<br/>(1.02-1.28)</i> | <i>0.0250</i> |

These analyses were conducted among participants in MDCS and in the placebo or lower intensity statin treatment arms (PROVE IT-TIMI 22) of the applicable trials

**Supplemental Table 4. Baseline Cholesterol Values Across Genetic Risk Score Categories**

|                              |                            | <b>Genetic Risk Score Categories</b> |                     |                |
|------------------------------|----------------------------|--------------------------------------|---------------------|----------------|
|                              |                            | <b>Low</b>                           | <b>Intermediate</b> | <b>High</b>    |
| <b>JUPITER</b>               | LDL-C, mg/dL<br>(mean, SD) | 106.42 (17.31)                       | 106.51 (17.08)      | 105.59 (18.08) |
|                              | HDL-C, mg/dL<br>(mean, SD) | 52.24 (15.50)                        | 52.30 (15.36)       | 51.58 (14.97)  |
| <b>CARE</b>                  | LDL-C, mg/dL<br>(mean, SD) | 137.80 (14.34)                       | 139.72 (14.63)      | 139.03 (14.84) |
|                              | HDL-C, mg/dL<br>(mean, SD) | 38.99 (9.19)                         | 38.03 (8.28)        | 39.10 (9.18)   |
| <b>PROVE IT-<br/>TIMI 22</b> | LDL-C, mg/dL<br>(mean, SD) | 110.4 (31.10)                        | 108.72 (30.35)      | 109.99 (27.90) |
|                              | HDL-C, mg/dL<br>(mean, SD) | 39.90 (10.13)                        | 39.84 (10.51)       | 39.93 (11.13)  |

Data for ASCOT are not available.



**Supplemental Table 5. Absolute and Percent Change in Cholesterol Values  
Across Genetic Risk Score Categories**

|                                         |                                          | <b>Genetic Risk Score Categories</b> |                     |                |
|-----------------------------------------|------------------------------------------|--------------------------------------|---------------------|----------------|
|                                         |                                          | <b>Low</b>                           | <b>Intermediate</b> | <b>High</b>    |
| <b>JUPITER<br/>Statin</b>               | Absolute Change LDL,<br>mg/dL (mean, SD) | -50.32 (26.78)                       | -50.34 (24.36)      | -50.42 (23.20) |
|                                         | Percent Change LDL,<br>(mean, SD)        | -46 (29)                             | -47 (23)            | -47 (22)       |
|                                         | Absolute Change HDL,<br>mg/dL (mean, SD) | 3.35 (8.58)                          | 3.81 (8.59)         | 3.84 (8.34)    |
|                                         | Percent Change HDL,<br>(mean, SD)        | 7.6 (1.6)                            | 8.5 (1.7)           | 9.0 (1.7)      |
|                                         |                                          |                                      |                     |                |
| <b>CARE<br/>Statin</b>                  | Absolute Change LDL,<br>mg/dL (mean, SD) | -46.39 (17.35)                       | -45.91 (18.93)      | -43.71 (19.42) |
|                                         | Percent Change LDL,<br>(mean, SD)        | -33.42 (11.93)                       | -32.73 (12.91)      | -31.21 (13.47) |
|                                         | Absolute Change HDL,<br>mg/dL (mean, SD) | 1.44 (4.99)                          | 1.88 (4.48)         | 1.77 (4.49)    |
|                                         | Percent Change HDL,<br>(mean, SD)        | 4.21 (12.14)                         | 5.54 (11.86)        | 5.28 (11.94)   |
|                                         |                                          |                                      |                     |                |
| <b>PROVE IT-TIMI 22<br/>Pravastatin</b> | Absolute Change LDL,<br>mg/dL (mean, SD) | -18.06 (28.89)                       | -19.20 (31.30)      | -16.44 (29.22) |
|                                         | Percent Change LDL,<br>(mean, SD)        | -12.13 (30.32)                       | -13.45 (30.02)      | -12.04 (27.00) |
|                                         | Absolute Change HDL,<br>mg/dL (mean, SD) | 1.14 (9.13)                          | 1.77 (7.74)         | 1.43 (8.11)    |

|                                               |                                          |                |                |                |
|-----------------------------------------------|------------------------------------------|----------------|----------------|----------------|
|                                               | Percent Change HDL,<br>(mean, SD)        | 4.43 (22.93)   | 6.09 (20.63)   | 6.23 (19.46)   |
|                                               |                                          |                |                |                |
| <b>PROVE IT-<br/>TIMI 22<br/>Atorvastatin</b> | Absolute Change LDL,<br>mg/dL (mean, SD) | -53.30 (35.18) | -49.34 (31.04) | -48.14 (31.24) |
|                                               | Percent Change LDL,<br>(mean, SD)        | -44.37 (25.30) | -42.86 (24.15) | -41.69 (26.21) |
|                                               | Absolute Change HDL,<br>mg/dL (mean, SD) | -0.08 (8.06)   | -0.07 (8.26)   | -0.24 (8.22)   |
|                                               | Percent Change HDL,<br>(mean, SD)        | 0.96 (19.68)   | 1.81 (20.80)   | 1.66 (20.40)   |

Data for ASCOT are not available.

**Supplemental Table 6. Risk of Coronary Heart Disease with Statin Therapy Across Genetic Risk Score Quintile**

|         | <b>Quintile</b> | <b># of Events, Control</b> | <b># of Individuals, Control</b> | <b>Event Rate, Control (%)</b> | <b># of Events, Statin</b> | <b># of Individuals, Statin</b> | <b>Event Rate, Statin (%)</b> | <b>Hazard Ratio</b> | <b>ARR (%)</b> |
|---------|-----------------|-----------------------------|----------------------------------|--------------------------------|----------------------------|---------------------------------|-------------------------------|---------------------|----------------|
| JUPITER | 1               | 10                          | 865                              | 1.16                           | 7                          | 878                             | 0.80                          | 0.68                | 0.36           |
|         | 2               | 12                          | 904                              | 1.33                           | 9                          | 838                             | 1.07                          | 0.80                | 0.26           |
|         | 3               | 12                          | 862                              | 1.39                           | 11                         | 880                             | 1.25                          | 1.01                | 0.14           |
|         | 4               | 19                          | 885                              | 2.22                           | 8                          | 887                             | 0.90                          | 0.43                | 1.32           |
|         | 5               | 14                          | 864                              | 1.62                           | 6                          | 878                             | 0.68                          | 0.41                | 0.94           |
| ASCOT   | 1               | 13                          | 432                              | 3.00                           | 8                          | 412                             | 1.94                          | 0.64                | 1.06           |
|         | 2               | 18                          | 402                              | 4.48                           | 11                         | 442                             | 2.49                          | 0.55                | 1.99           |
|         | 3               | 13                          | 381                              | 3.41                           | 14                         | 462                             | 3.03                          | 0.89                | 0.38           |
|         | 4               | 17                          | 404                              | 4.21                           | 12                         | 440                             | 2.73                          | 0.65                | 1.48           |
|         | 5               | 28                          | 426                              | 6.57                           | 15                         | 418                             | 3.59                          | 0.54                | 2.98           |

|                   |   |    |     |       |    |     |       |      |       |
|-------------------|---|----|-----|-------|----|-----|-------|------|-------|
| CARE              | 1 | 26 | 278 | 9.35  | 22 | 297 | 7.41  | 0.79 | 1.95  |
|                   | 2 | 41 | 291 | 14.09 | 26 | 285 | 9.12  | 0.64 | 4.97  |
|                   | 3 | 37 | 298 | 12.42 | 28 | 277 | 10.11 | 0.82 | 2.31  |
|                   | 4 | 41 | 288 | 14.24 | 38 | 288 | 13.19 | 0.91 | 1.04  |
|                   | 5 | 38 | 277 | 13.72 | 23 | 299 | 7.69  | 0.54 | 6.03  |
| PROVE IT-TIMI 22* | 1 | 20 | 213 | 9.39  | 21 | 186 | 11.29 | 1.24 | -1.90 |
|                   | 2 | 26 | 206 | 12.62 | 15 | 194 | 7.73  | 0.61 | 4.89  |
|                   | 3 | 33 | 205 | 16.10 | 18 | 195 | 9.23  | 0.57 | 6.87  |
|                   | 4 | 29 | 194 | 14.95 | 22 | 206 | 10.68 | 0.70 | 4.27  |
|                   | 5 | 28 | 188 | 14.89 | 17 | 212 | 8.02  | 0.51 | 6.87  |

\*In PROVE IT-TIMI 22, the control group is moderate intensity statin therapy (pravastatin 40 mg) and the statin group is high intensity statin therapy (atorvastatin 80 mg). ARR indicates absolute risk reduction.

## Supplemental Figure 1. Distribution of the Genetic Risk Score

MDCS

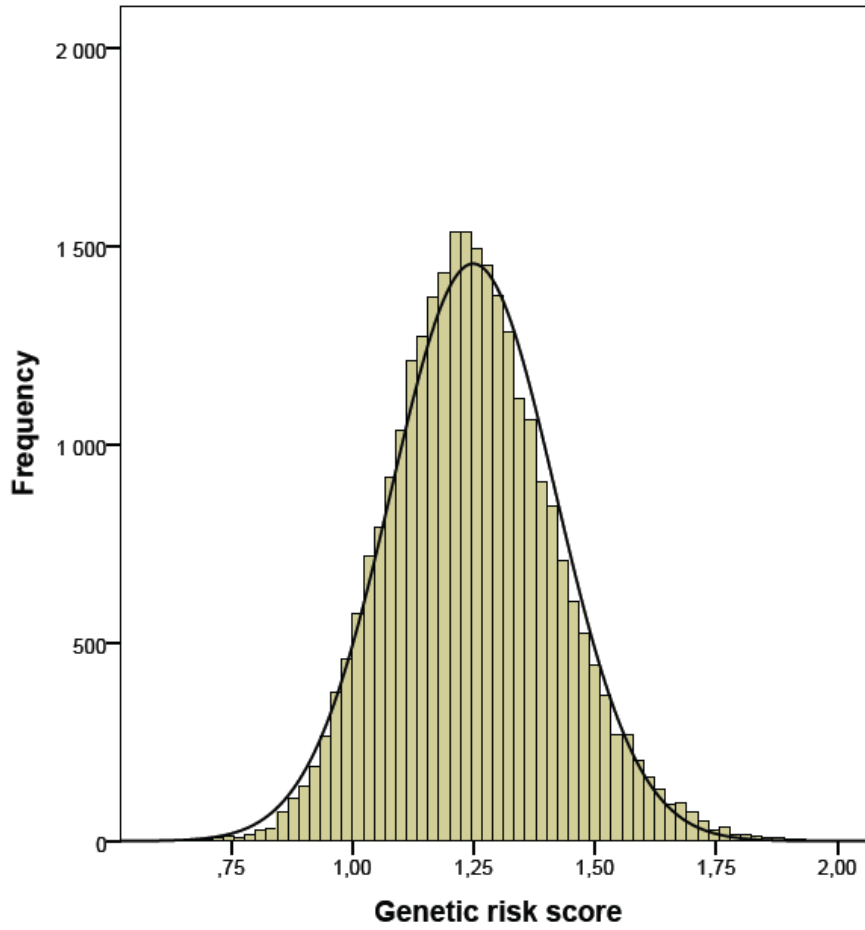

# JUPITER

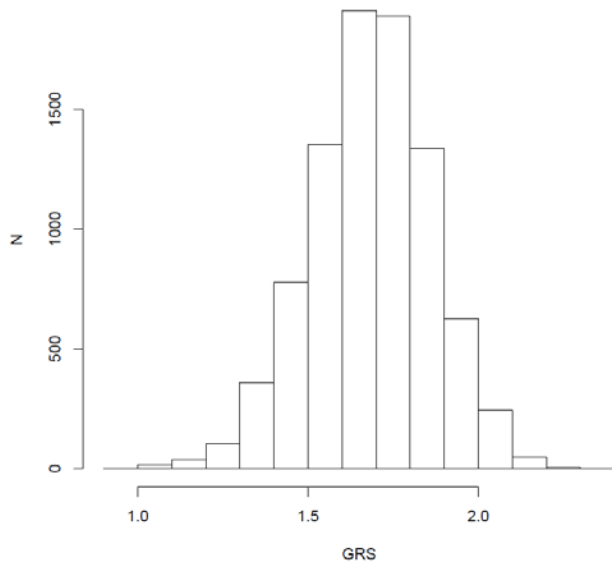

# ASCOT

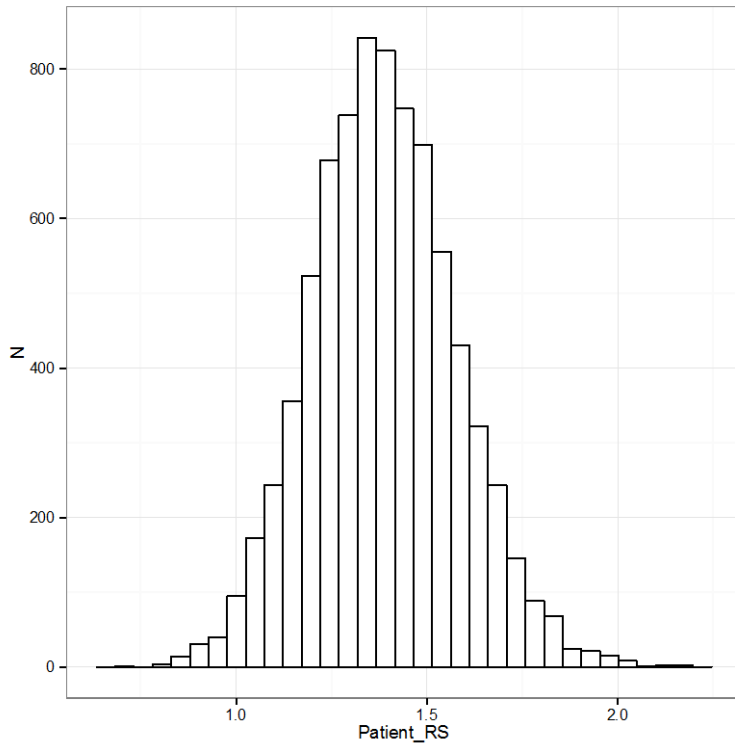

CARE

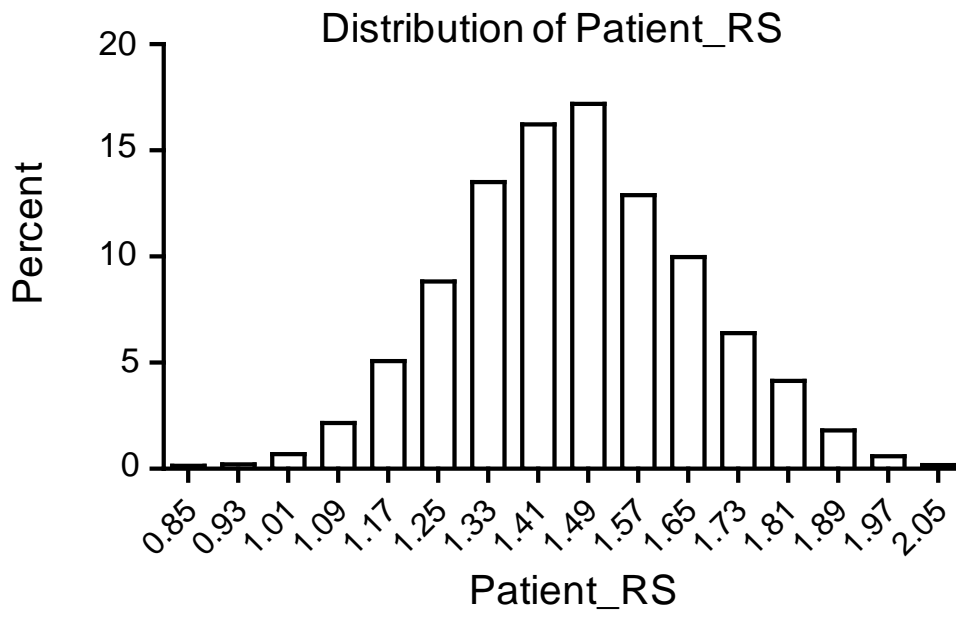

# PROVE IT-TIMI 22

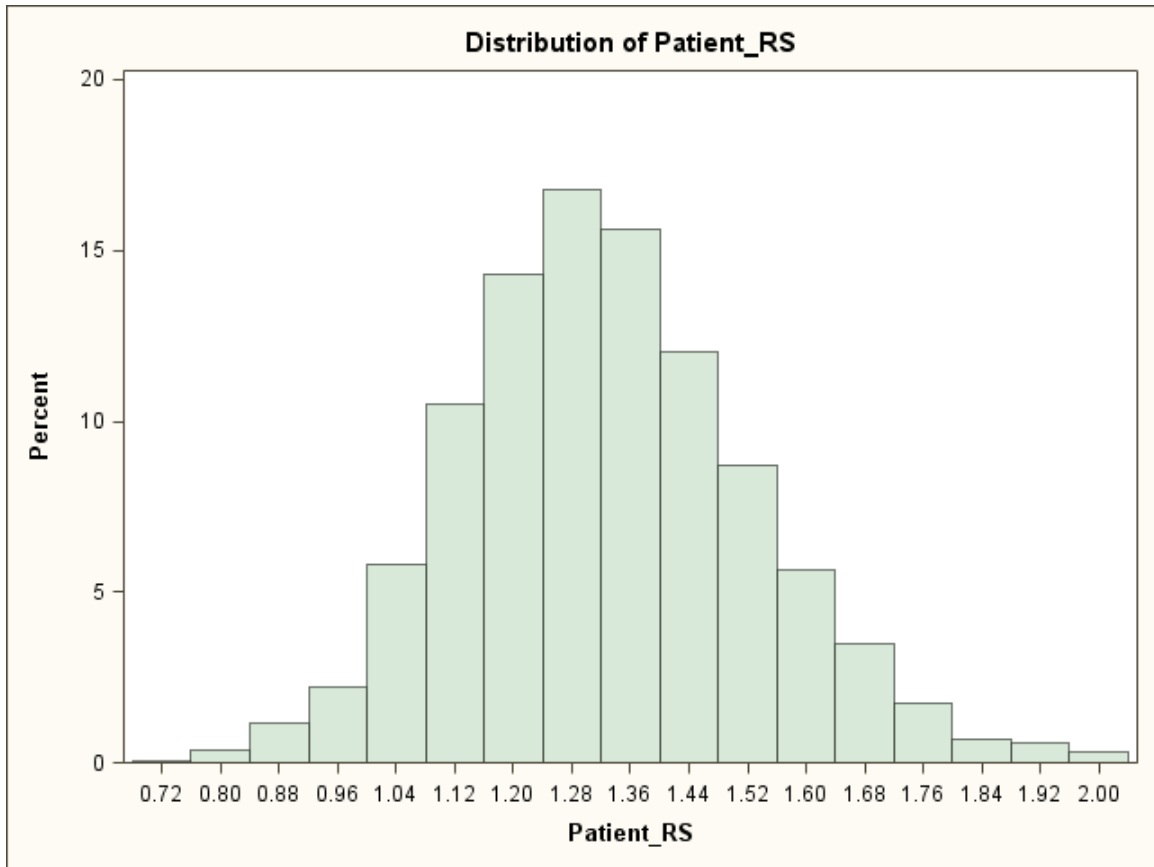



**Supplemental Figure 2. Magnitude of the Absolute Risk Difference of Coronary Heart Disease with Statin Therapy Across Genetic Risk Score Categories**

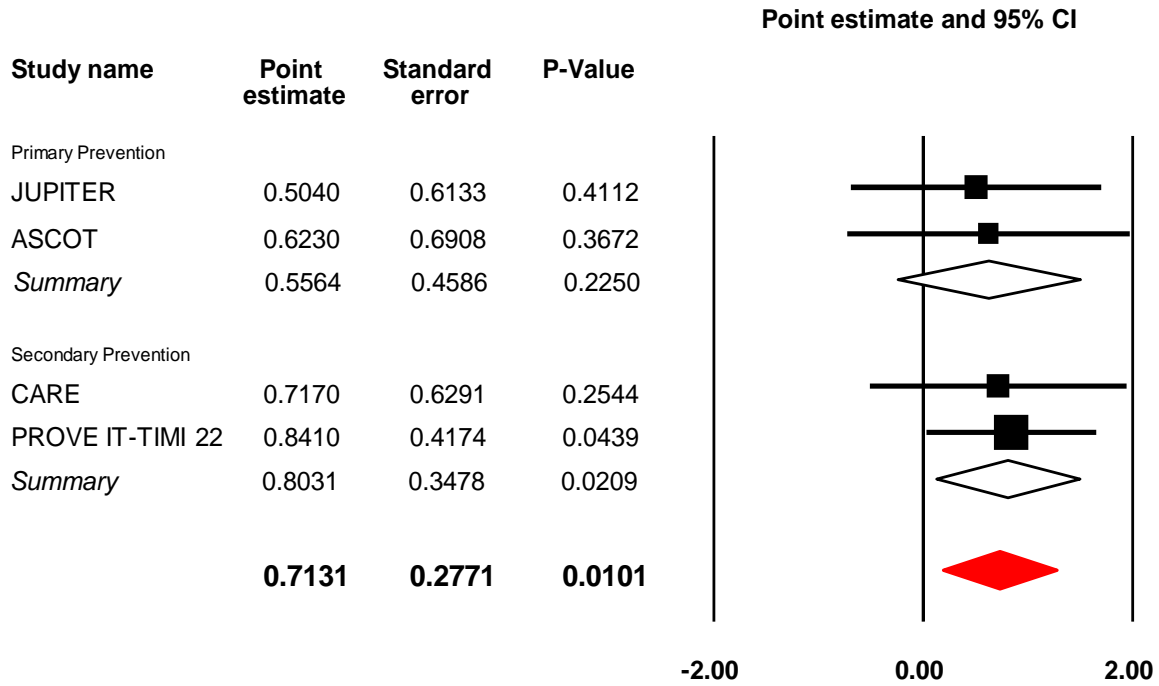

Supplement: NIHMS698382-supplement-01.pdf [file NIHMS698382-supplement-01.pdf]
